# Supplementary material for: Small compound – big colors: synthesis and structural investigation of brightly colored alkaline earth metal 1,3-dimethylviolurates
Source: Royal Society of Chemistry journal article supplement (doi:10.1039/d2dt00606e), 2022-01-01
Supplement: d2dt00606e1.pdf [file d2dt00606e1.pdf]

# Supplementary Information

## Small Compound - Big Colors: Synthesis and Structural Investigation of Brightly Colored Alkaline Earth Metal 1,3-Dimethylviolurates

Volker Lorenz,<sup>a</sup> Phil Liebing,<sup>a,b</sup> Matthias Müller,<sup>c</sup> Liane Hilfert,<sup>a</sup> Martin Feneberg,<sup>d</sup> Elias Kluth,<sup>d</sup> Marcel Kühling,<sup>a</sup> Magnus R. Buchner,<sup>c</sup> Rüdiger Goldhahn<sup>d</sup> and Frank T. Edelmann<sup>d,\*</sup>

<sup>a</sup> *Chemisches Institut, Otto-von-Guericke-Universität Magdeburg, Universitätsplatz 2, 39106 Magdeburg, Germany.*

<sup>b</sup> *Institut für Anorganische und Analytische Chemie, Humboldtstr. 8, 07743 Jena, Germany.*

<sup>c</sup> *Fachbereich Chemie, Philipps-Universität Marburg, Hans-Meerwein-Straße 4, 35032 Marburg, Germany.*

<sup>d</sup> *Institut für Physik, Otto-von-Guericke-Universität Magdeburg, Universitätsplatz 2, 39106 Magdeburg, Germany.*

## Table of Contents

|                   |     |
|-------------------|-----|
| 1. IR spectra     | S3  |
| 2. NMR spectra    | S8  |
| 3. Raman spectra  | S17 |
| 4. UV-vis spectra | S19 |

# 1. IR spectra of all title compounds

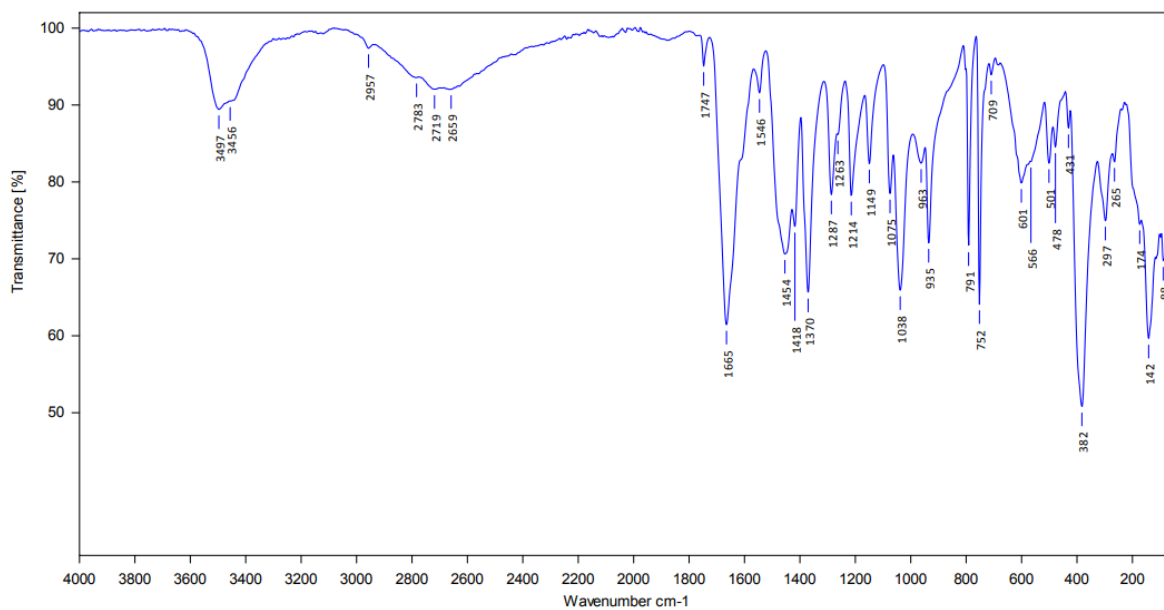

Figure S1. IR spectrum of  $[(\text{Me}_2\text{Vio})(\text{H}_2\text{O})]$  (2)

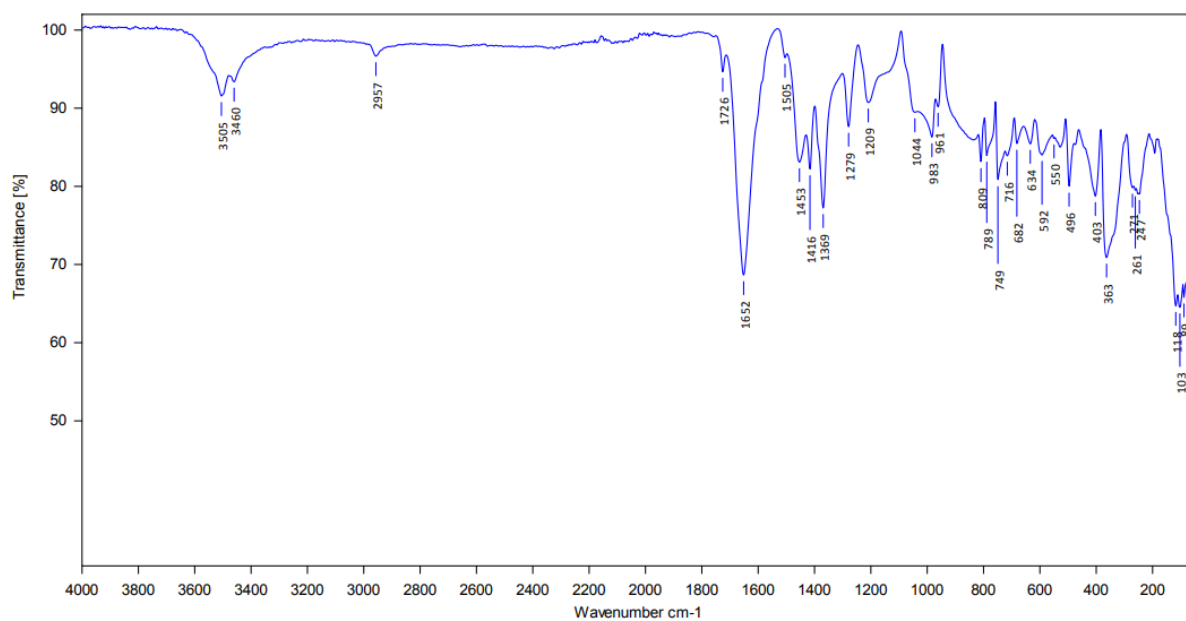

Figure S2. IR spectrum of  $[(\text{Me}_2\text{Vio})(\text{H}_2\text{O})]$  (2a)

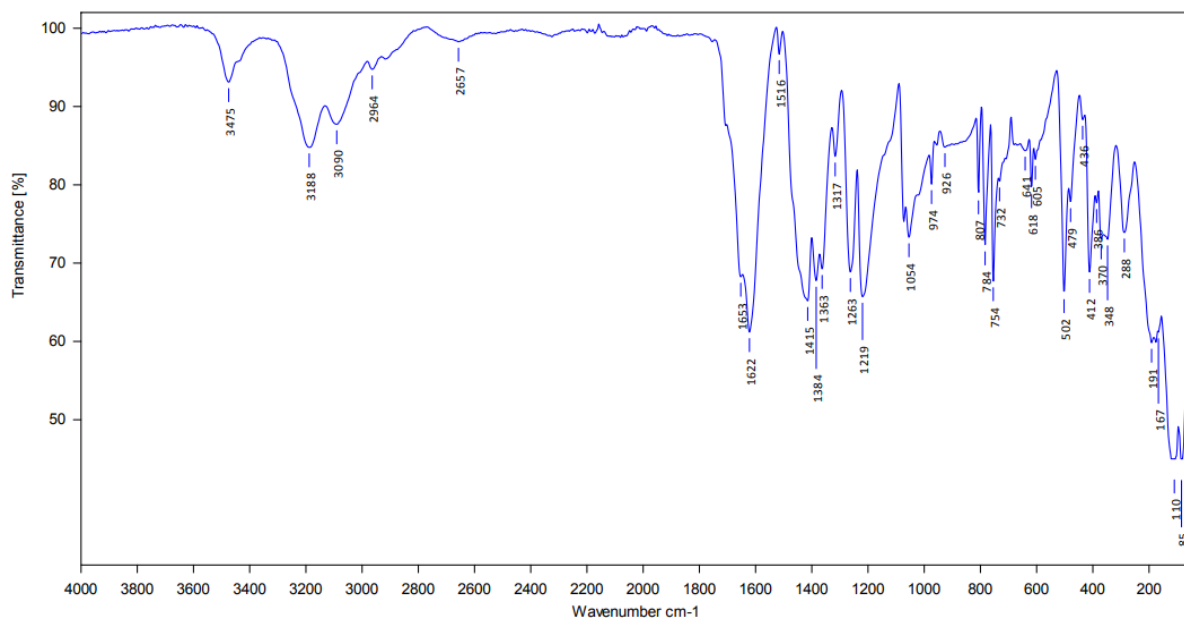

**Figure S3.** IR spectrum of  $[\text{H}_3\text{O}]^+[(\text{Me}_2\text{Vio})(\text{H}_2\text{O})]^-$  (2b)

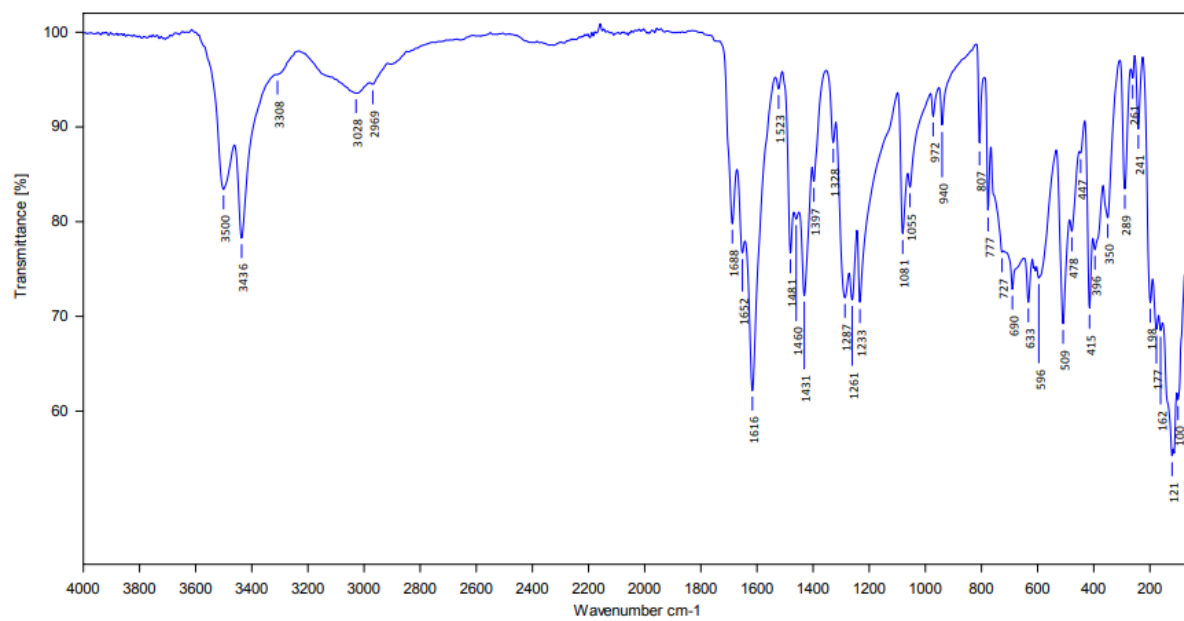

**Figure S4.** IR spectrum of  $[\text{Mg}(\text{Me}_2\text{Vio})_2(\text{H}_2\text{O})_6]$  (3)

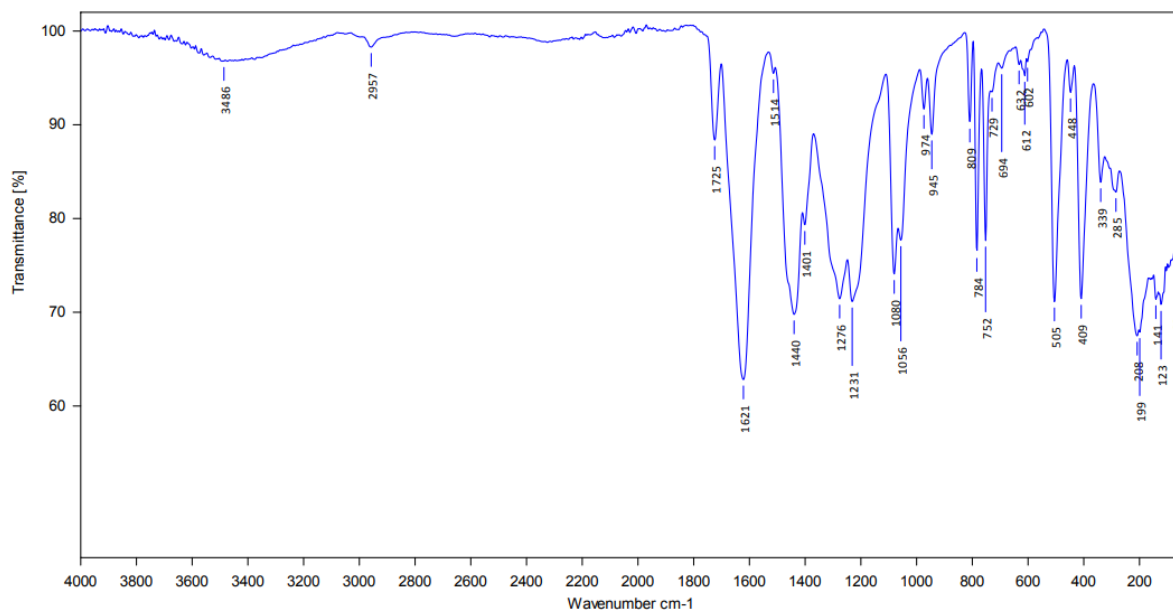

**Figure S5.** IR spectrum of [Ca(Me<sub>2</sub>Vio)(H<sub>2</sub>O)<sub>8</sub>] (4)

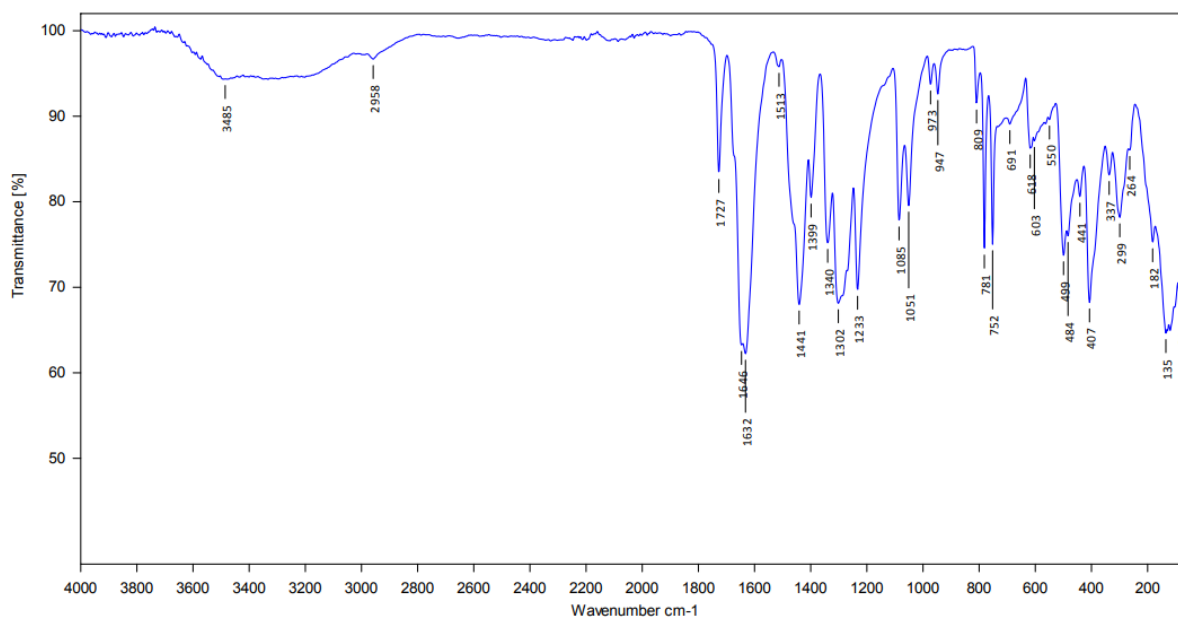

**Figure S6.** IR spectrum of [Sr(Me<sub>2</sub>Vio)<sub>2</sub>(H<sub>2</sub>O)<sub>6</sub>] (5)

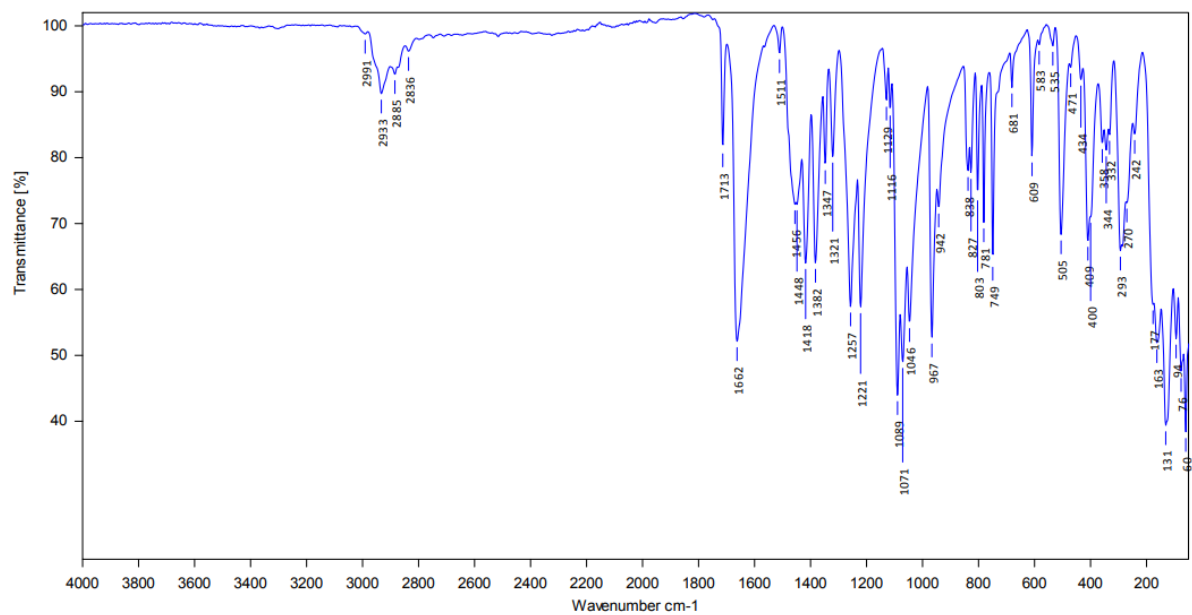

**Figure S7.** IR spectrum of [Sr(Me<sub>2</sub>Vio)<sub>2</sub>(18-crown-6)] (5a)

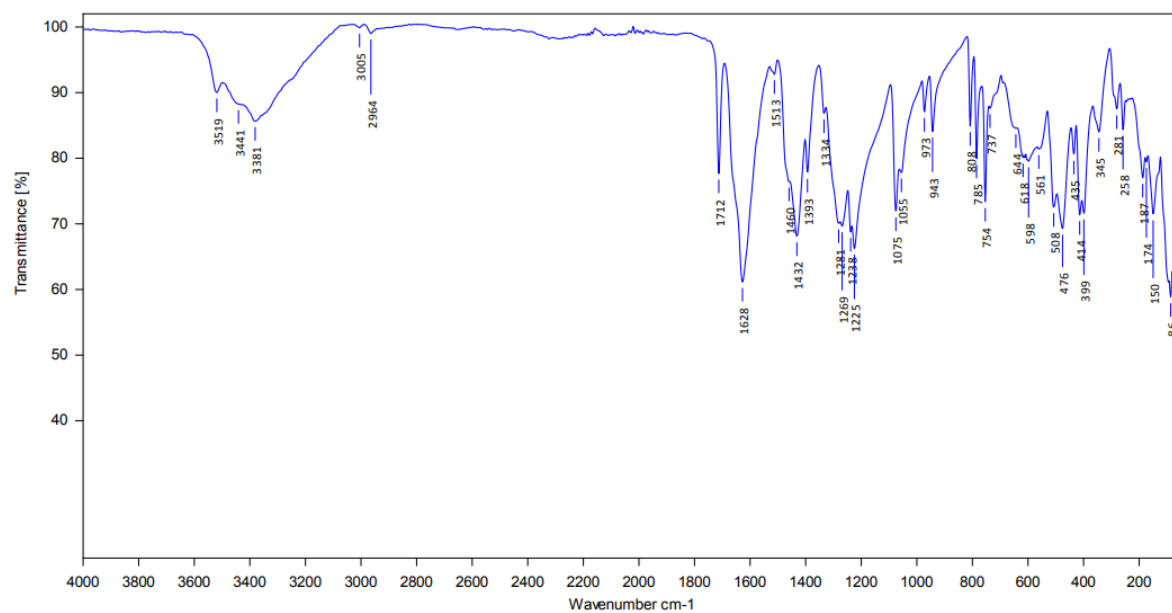

**Figure S8.** IR spectrum of [Ba(Me<sub>2</sub>Vio)<sub>2</sub>(H<sub>2</sub>O)<sub>4</sub>] (6)

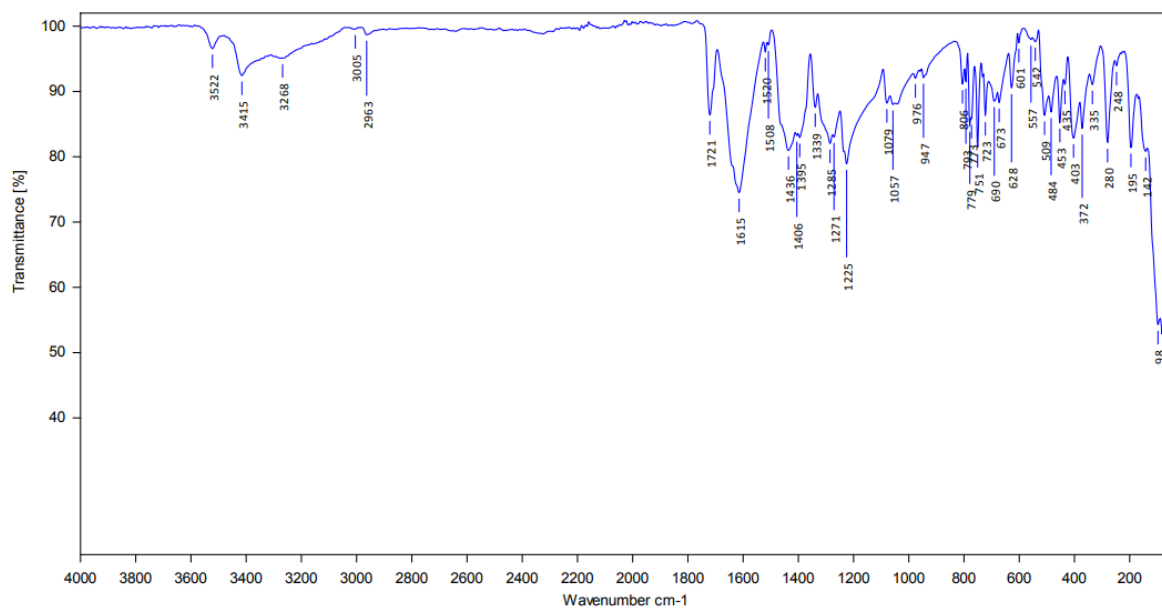

**Figure S9.** IR spectrum of  $[\text{Ba}(\text{Me}_2\text{Vio})(\text{NO}_2\text{Barb}) \cdot 4\text{H}_2\text{O}]$  (**8**)

## 2. NMR spectra of all title compounds

$^1\text{H}$  NMR in  $\text{DMSO-}d_6$ :

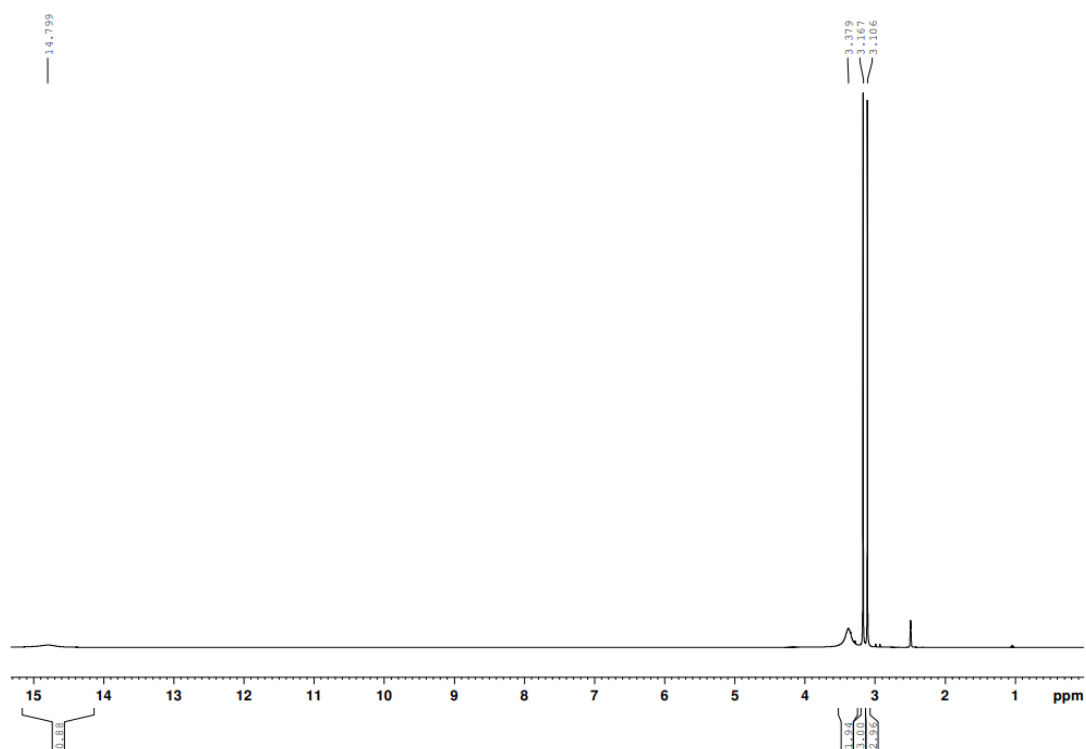

$^{13}\text{C}$  NMR in  $\text{DMSO-}d_6$ :

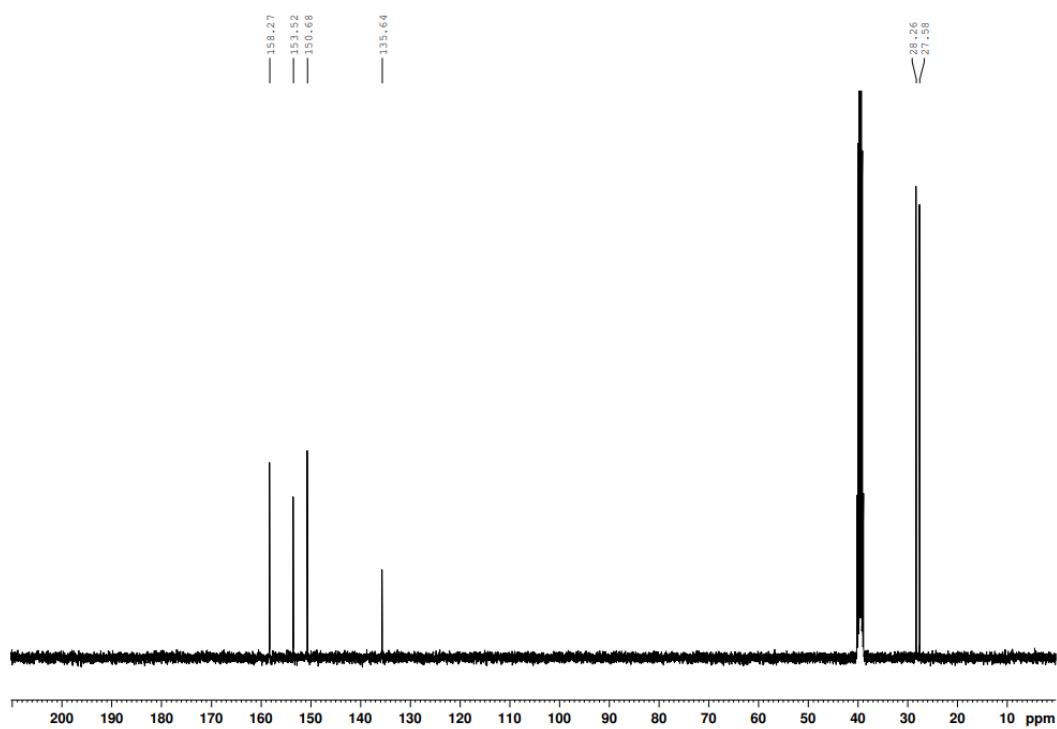

**Figure S10.**  $^1\text{H}$  and  $^{13}\text{C}$  NMR spectra of original (colorless)  $\text{H}(\text{Me}_2\text{Vio})\cdot\text{H}_2\text{O}$  (**2**) in  $\text{DMSO-}d_6$



$^1\text{H}$  NMR in  $\text{DMSO-}d_6$ :

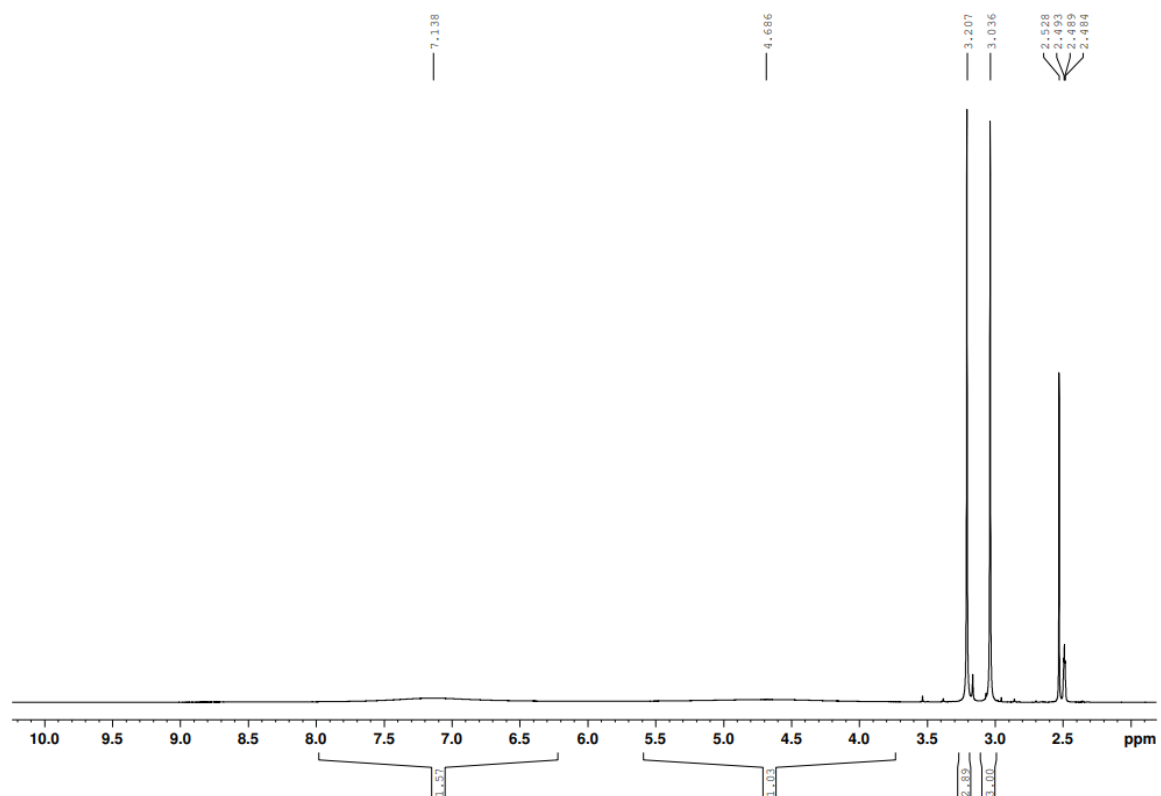

$^{13}\text{C}$  NMR in  $\text{DMSO-}d_6$ :

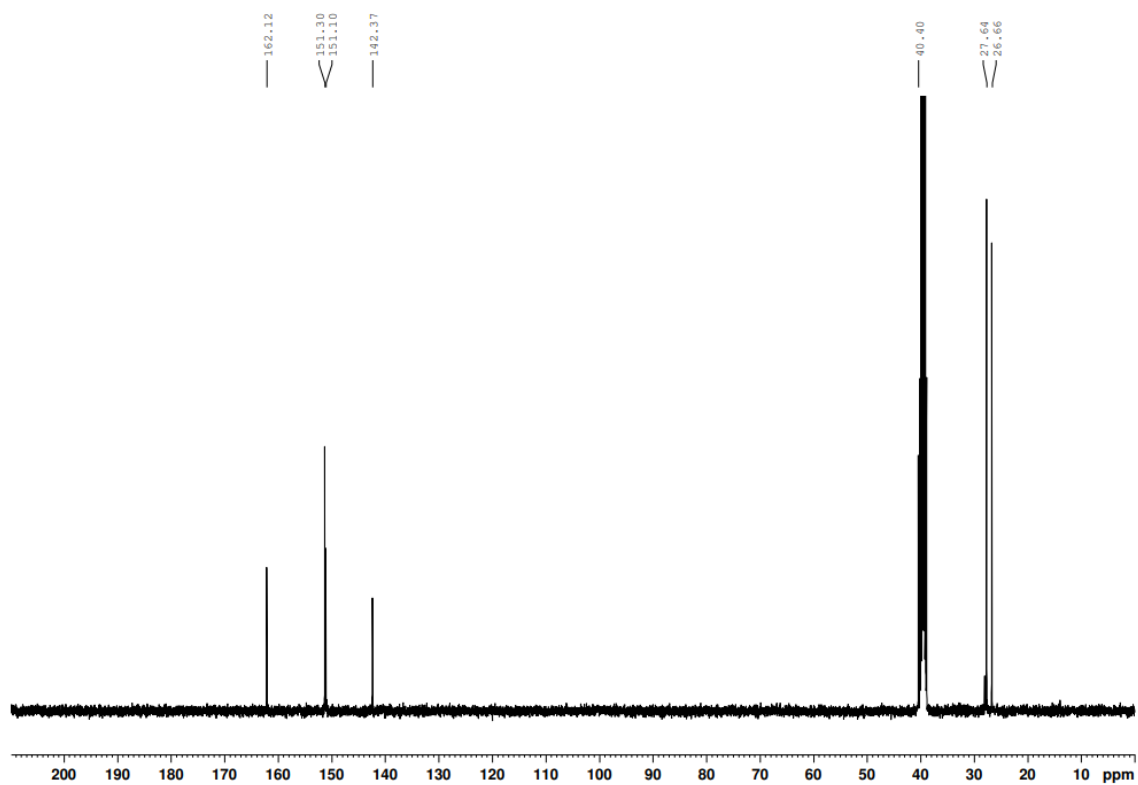

**Figure S11.**  $^1\text{H}$  and  $^{13}\text{C}$  NMR spectra of orange  $\text{H}(\text{Me}_2\text{Vio})\cdot\text{H}_2\text{O}$  (**2a**) in  $\text{DMSO-}d_6$

$^1\text{H}$  NMR in  $\text{DMSO-}d_6$ :

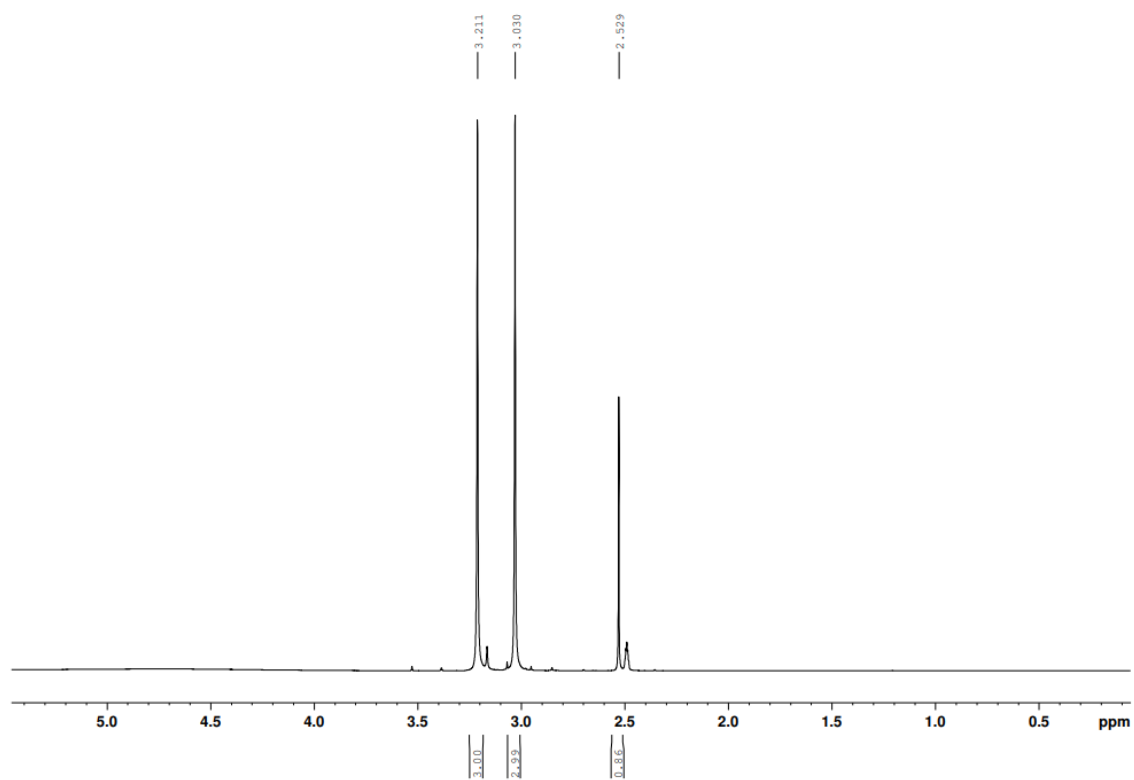

$^{13}\text{C}$  NMR in  $\text{DMSO-}d_6$ :

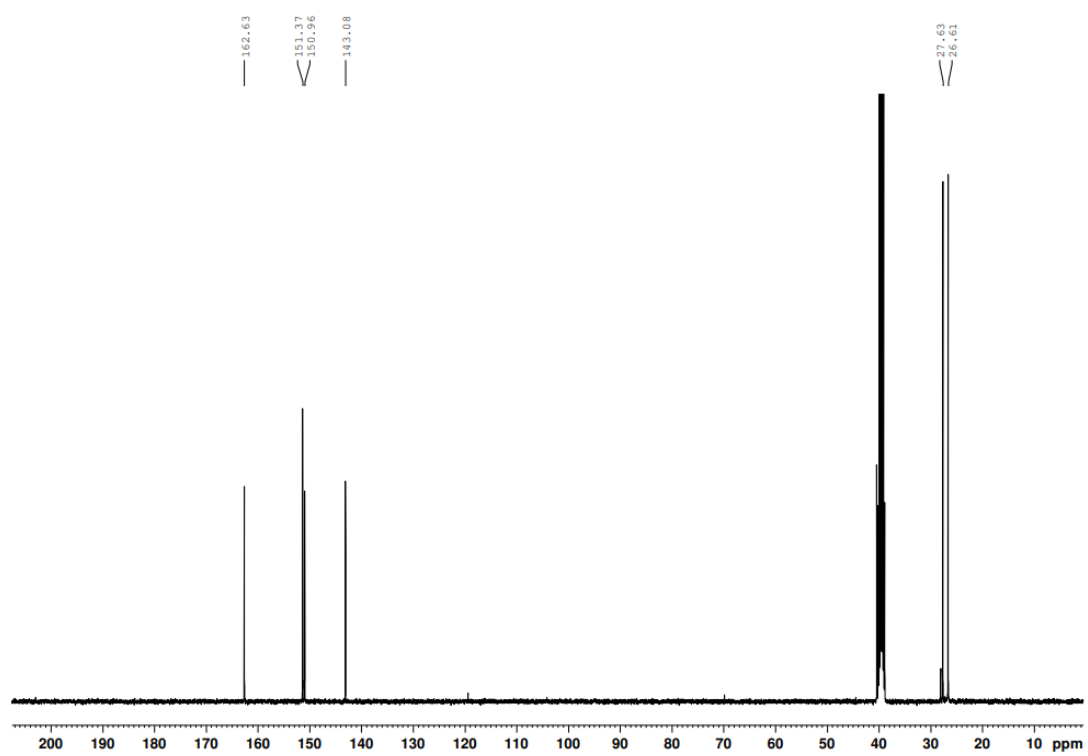

**Figure S12.**  $^1\text{H}$  and  $^{13}\text{C}$  NMR spectra of  $[\text{H}_3\text{O}][\text{Me}_2\text{Vio}]$  (**2b**) in  $\text{DMSO-}d_6$

$^1\text{H}$  NMR in in  $\text{DMSO-}d_6$ :

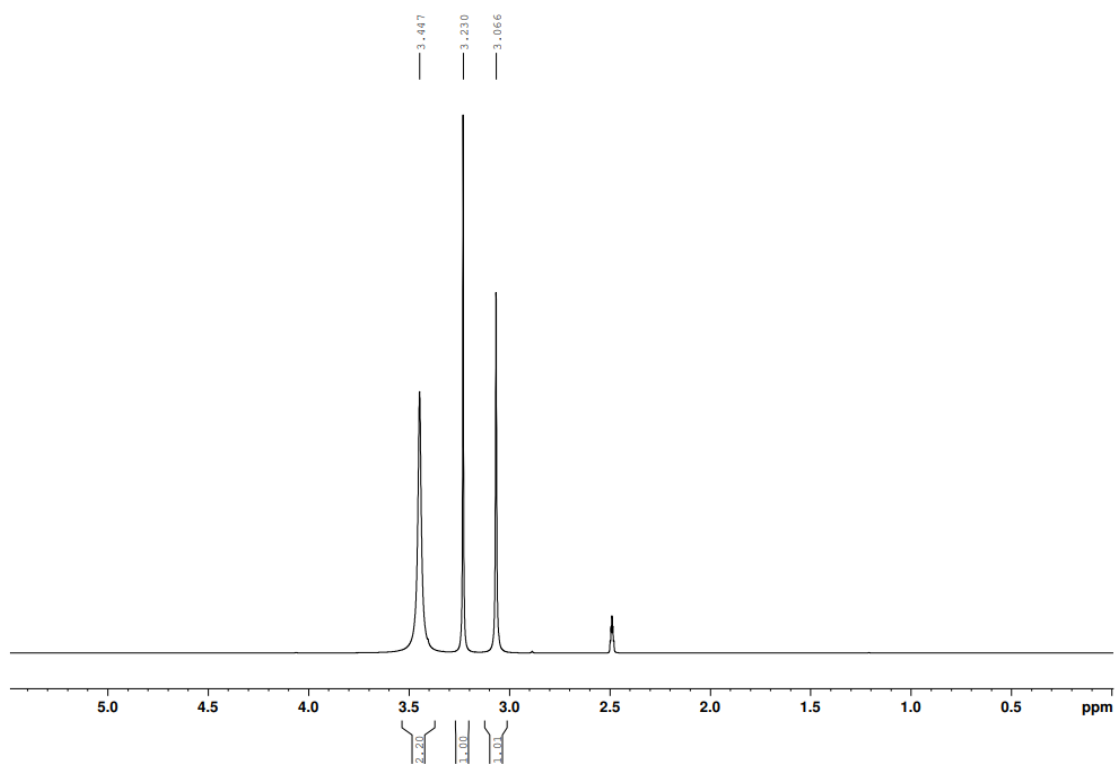

$^{13}\text{C}$  NMR in  $\text{DMSO-}d_6$ :

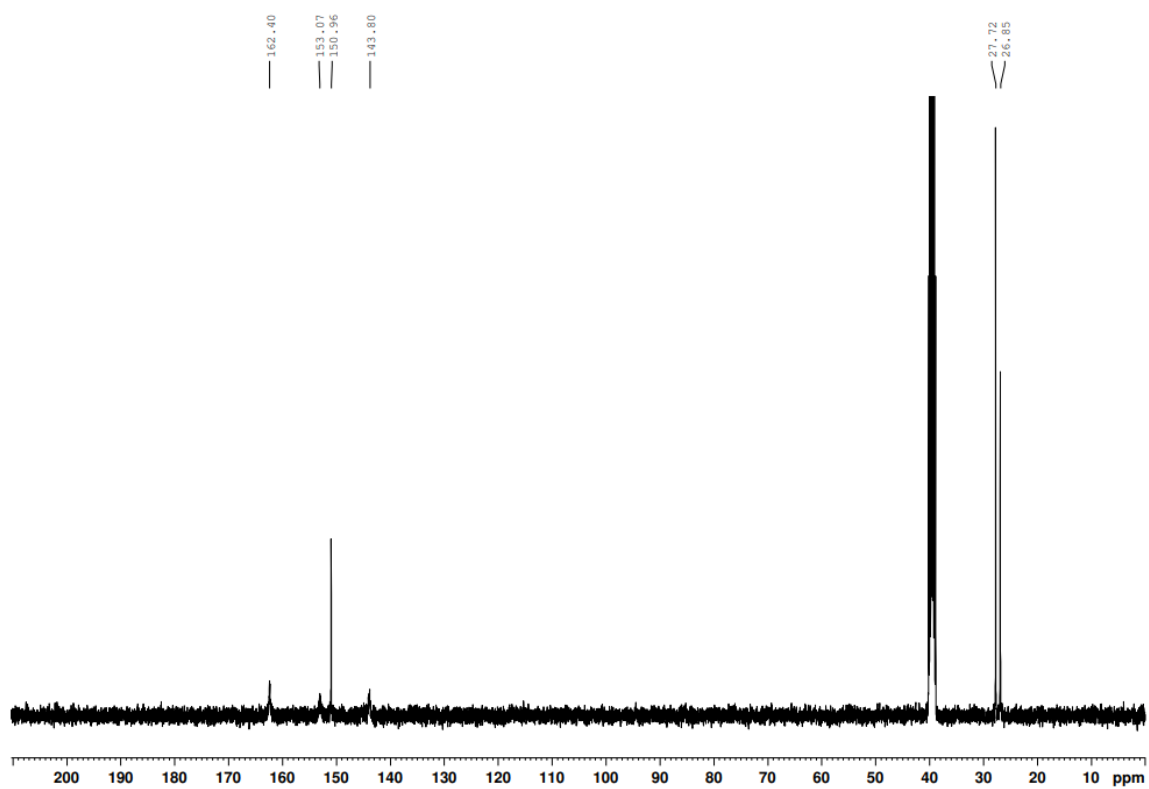

**Figure S13.**  $^1\text{H}$  and  $^{13}\text{C}$  NMR spectra of  $[\text{Mg}(\text{H}_2\text{O})_6](\text{Me}_2\text{Vio})_2$  (**3**) in  $\text{DMSO-}d_6$

$^1\text{H}$  NMR in  $\text{DMSO-}d_6$ :

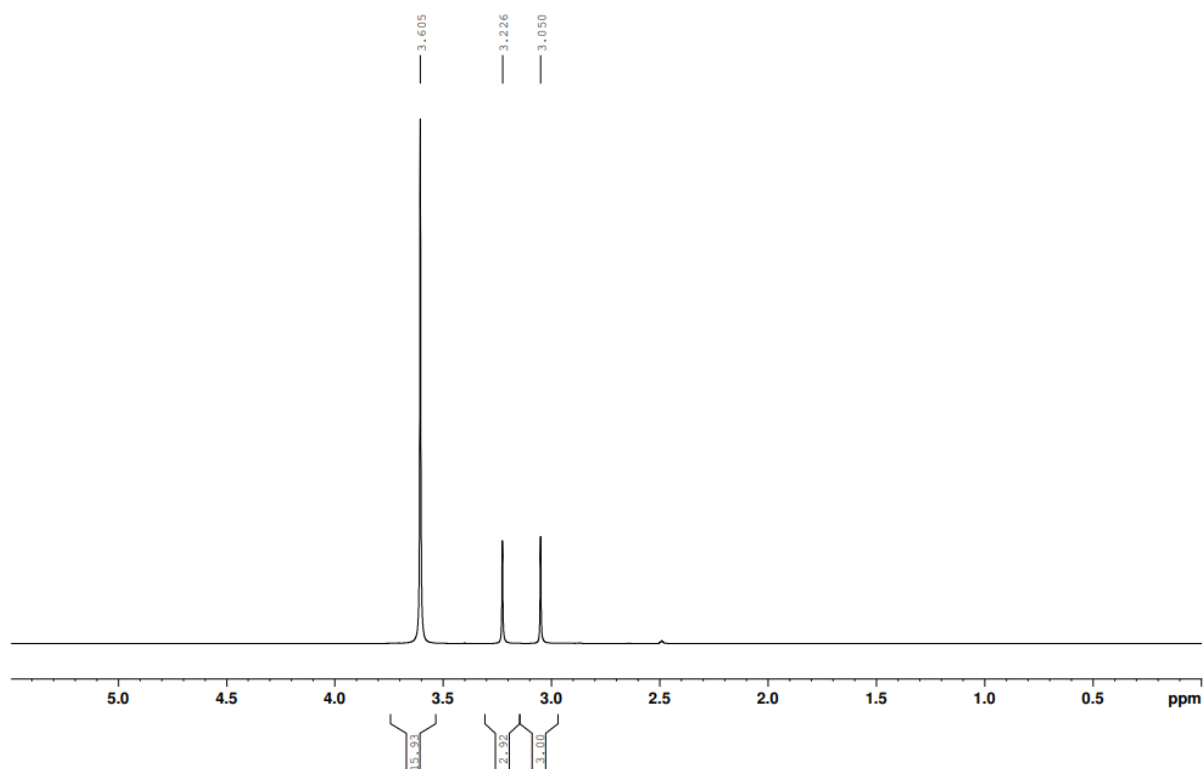

$^{13}\text{C}$  NMR in  $\text{DMSO-}d_6$ :

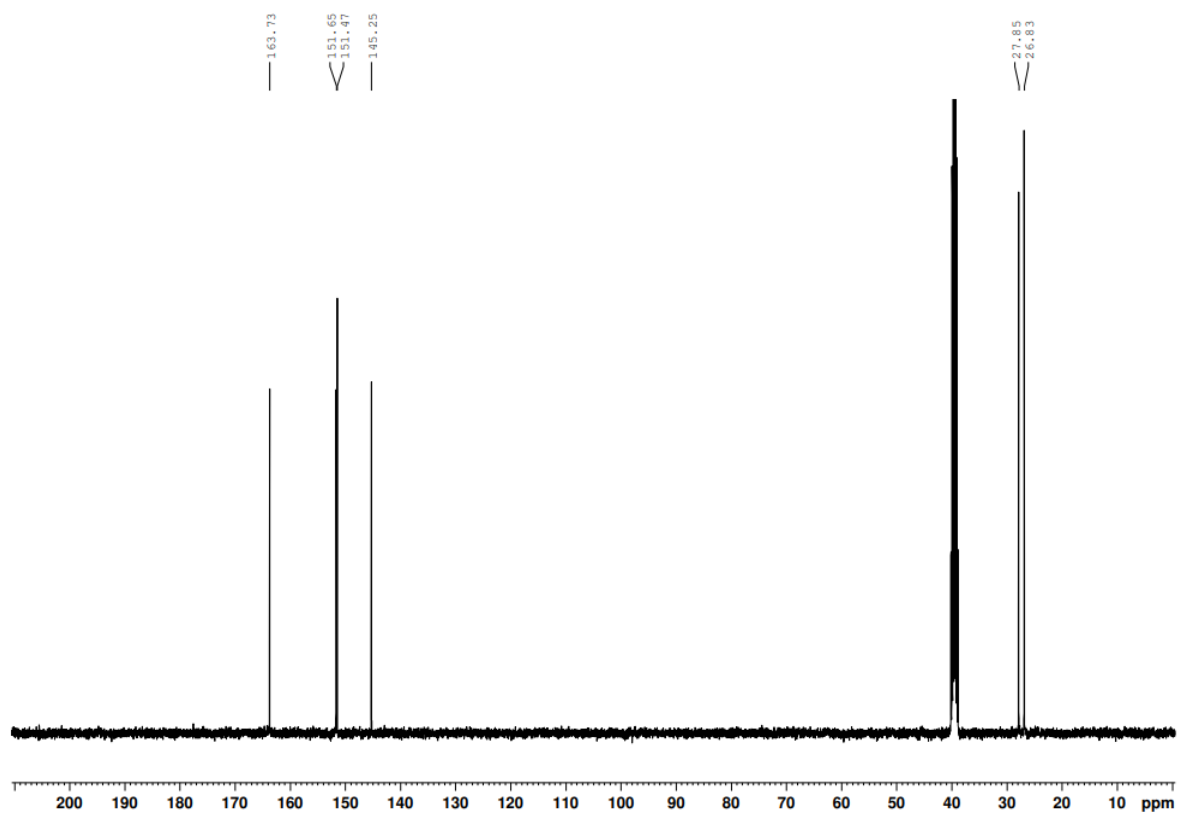

**Figure S14.**  $^1\text{H}$  and  $^{13}\text{C}$  NMR spectra of  $\text{Ca}(\text{Me}_2\text{Vio})\cdot 8\text{H}_2\text{O}$  (4) in  $\text{DMSO-}d_6$

$^1\text{H}$  NMR in  $\text{DMSO-}d_6$ :

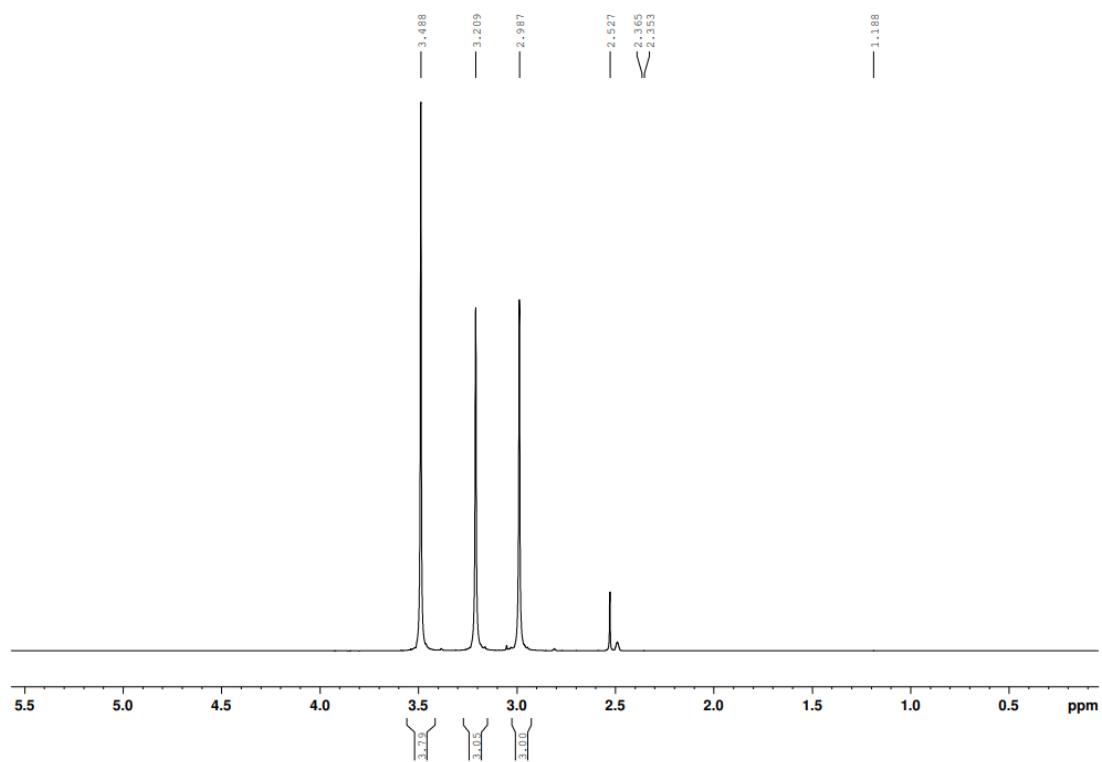

$^{13}\text{C}$  NMR in  $\text{DMSO-}d_6$ :

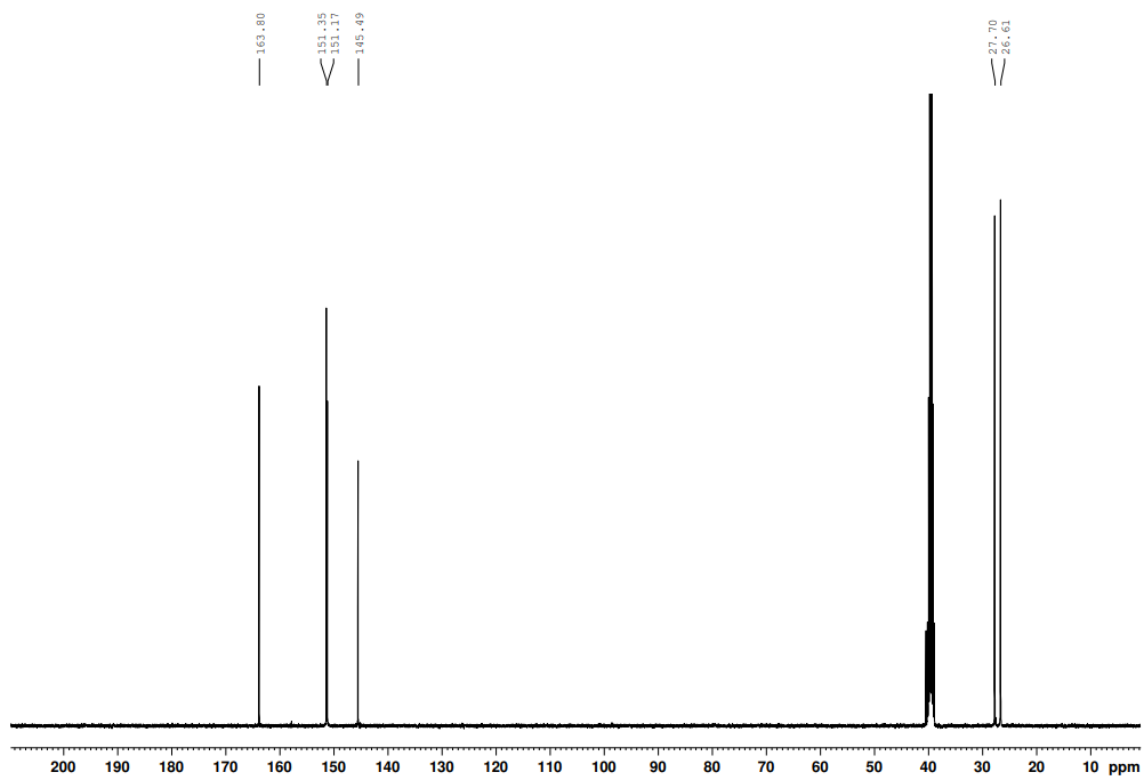

**Figure S15.**  $^1\text{H}$  and  $^{13}\text{C}$  NMR spectra of  $\text{Sr}(\text{Me}_2\text{Vio})_2 \cdot 6\text{H}_2\text{O}$  (5) in  $\text{DMSO-}d_6$

$^1\text{H}$  NMR in  $\text{DMSO-}d_6$ :

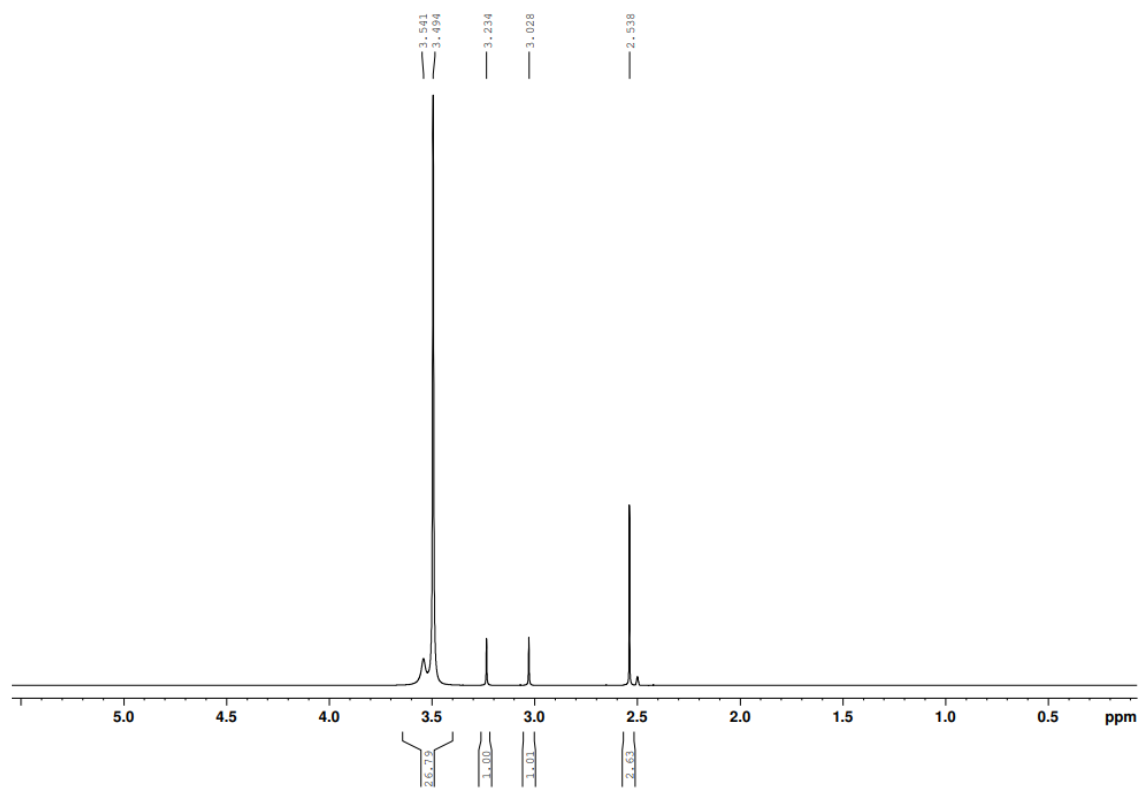

$^{13}\text{C}$  NMR in in  $\text{DMSO-}d_6$ :

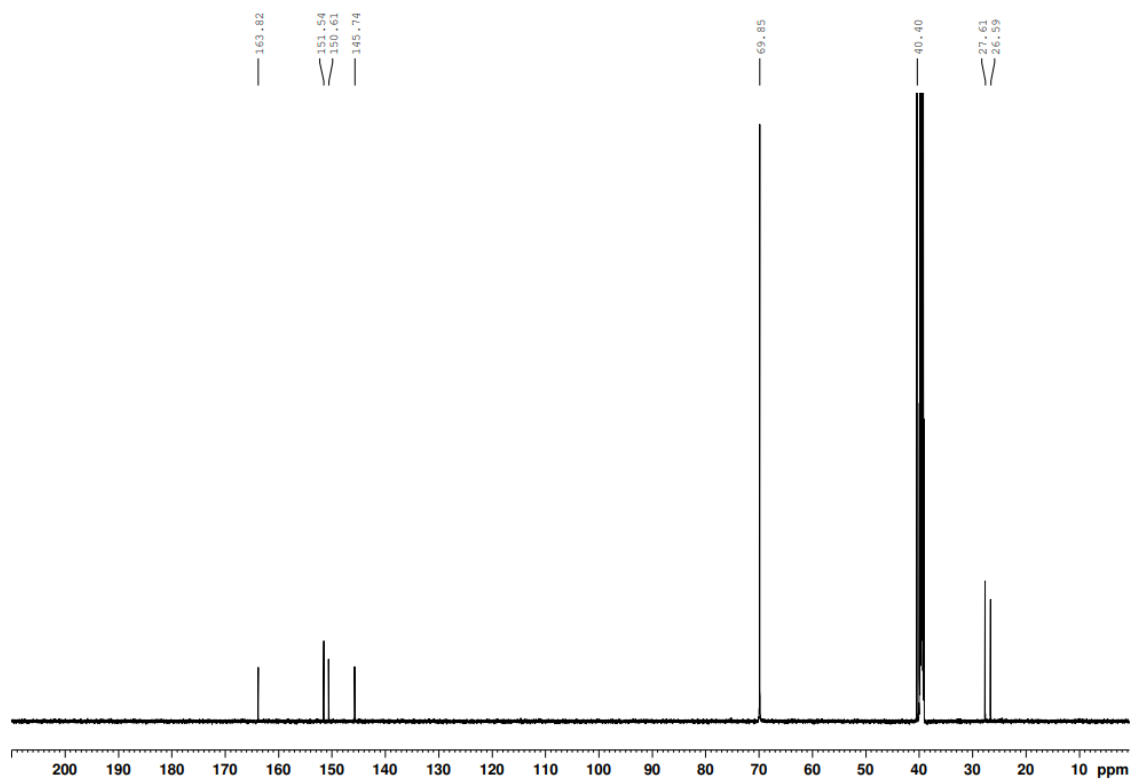

**Figure S16.**  $^1\text{H}$  and  $^{13}\text{C}$  NMR spectra of  $\text{Sr}(\text{Me}_2\text{Vio})_2(18\text{-crown-}6)$  (**5a**) in  $\text{DMSO-}d_6$

$^1\text{H}$  NMR in  $\text{DMSO-}d_6$ :

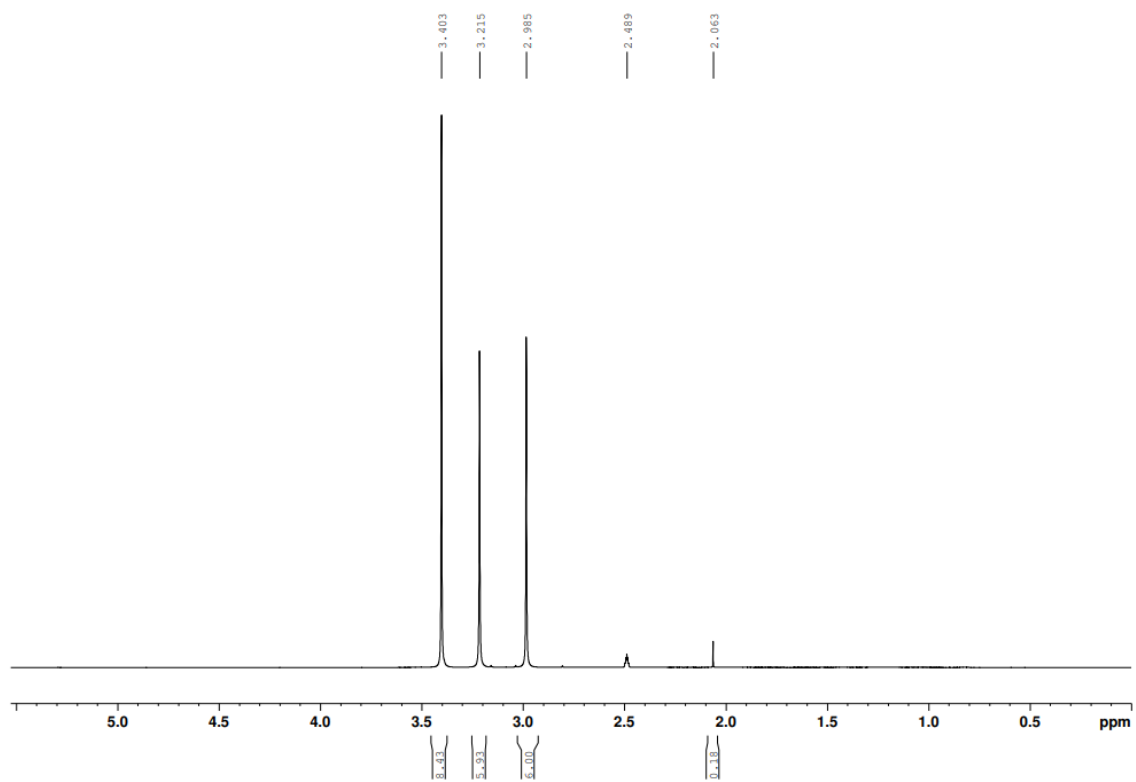

$^{13}\text{C}$  NMR in  $\text{DMSO-}d_6$ :

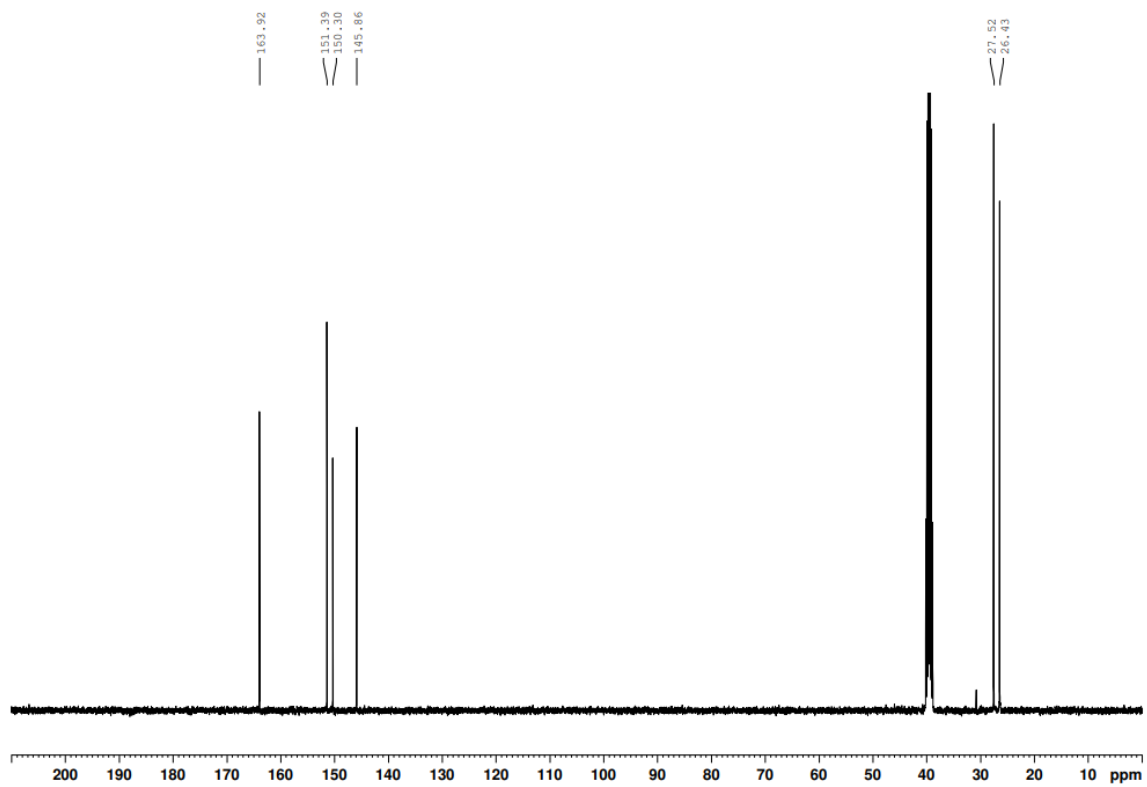

**Figure S17.**  $^1\text{H}$  and  $^{13}\text{C}$  NMR spectra of  $\text{Ba}(\text{Me}_2\text{Vio})_2 \cdot 4\text{H}_2\text{O}$  (6) in  $\text{DMSO-}d_6$

$^1\text{H}$  NMR in  $\text{DMSO-}d_6$ :

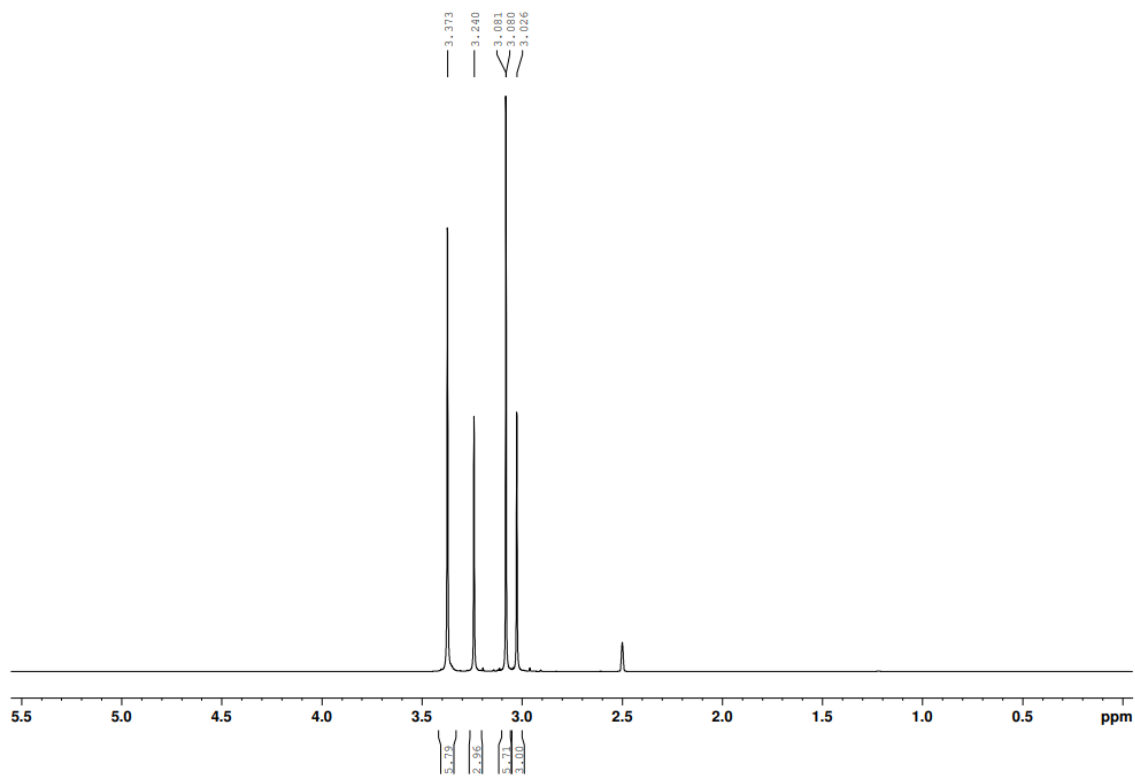

$^{13}\text{C}$  NMR in  $\text{DMSO-}d_6$ :

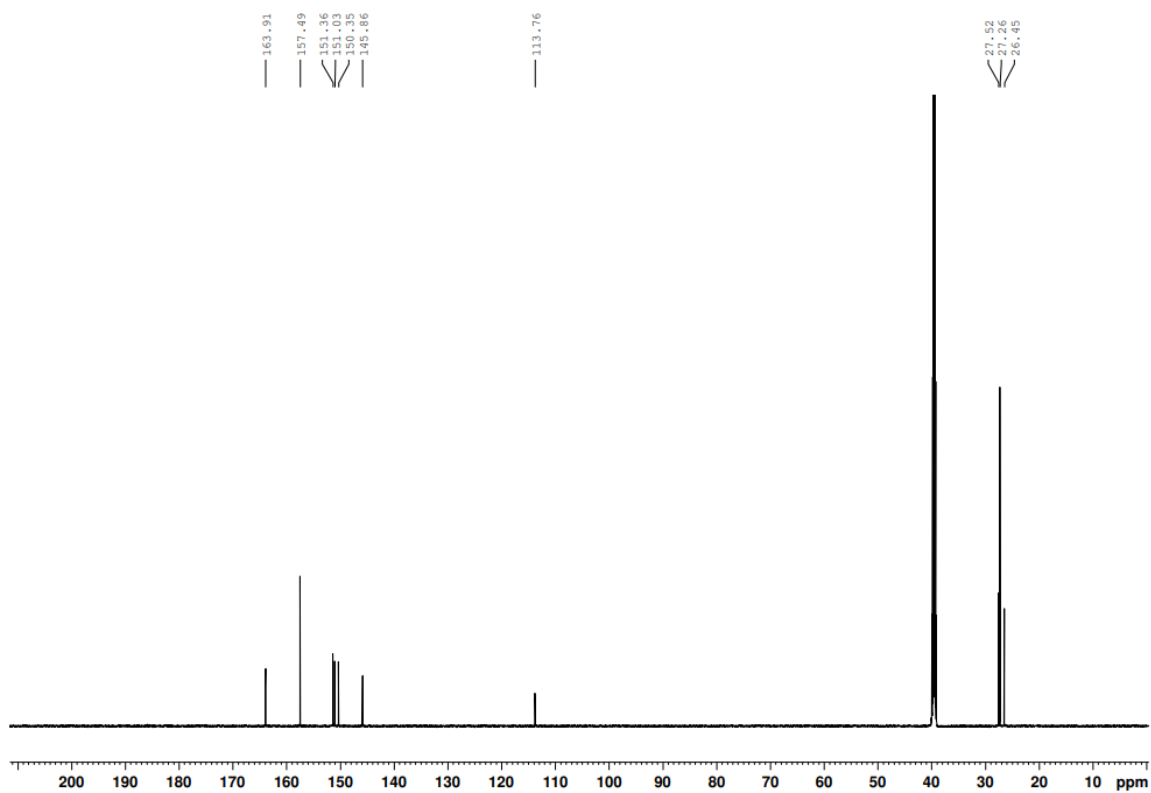

**Figure S18.**  $^1\text{H}$  and  $^{13}\text{C}$  NMR spectra of  $\text{Ba}(\text{Me}_2\text{Vio})(\text{Me}_2\text{NO}_2\text{Barb})\cdot 2\text{H}_2\text{O}$  (**8**) in  $\text{DMSO-}d_6$



## 3. Raman Spectra

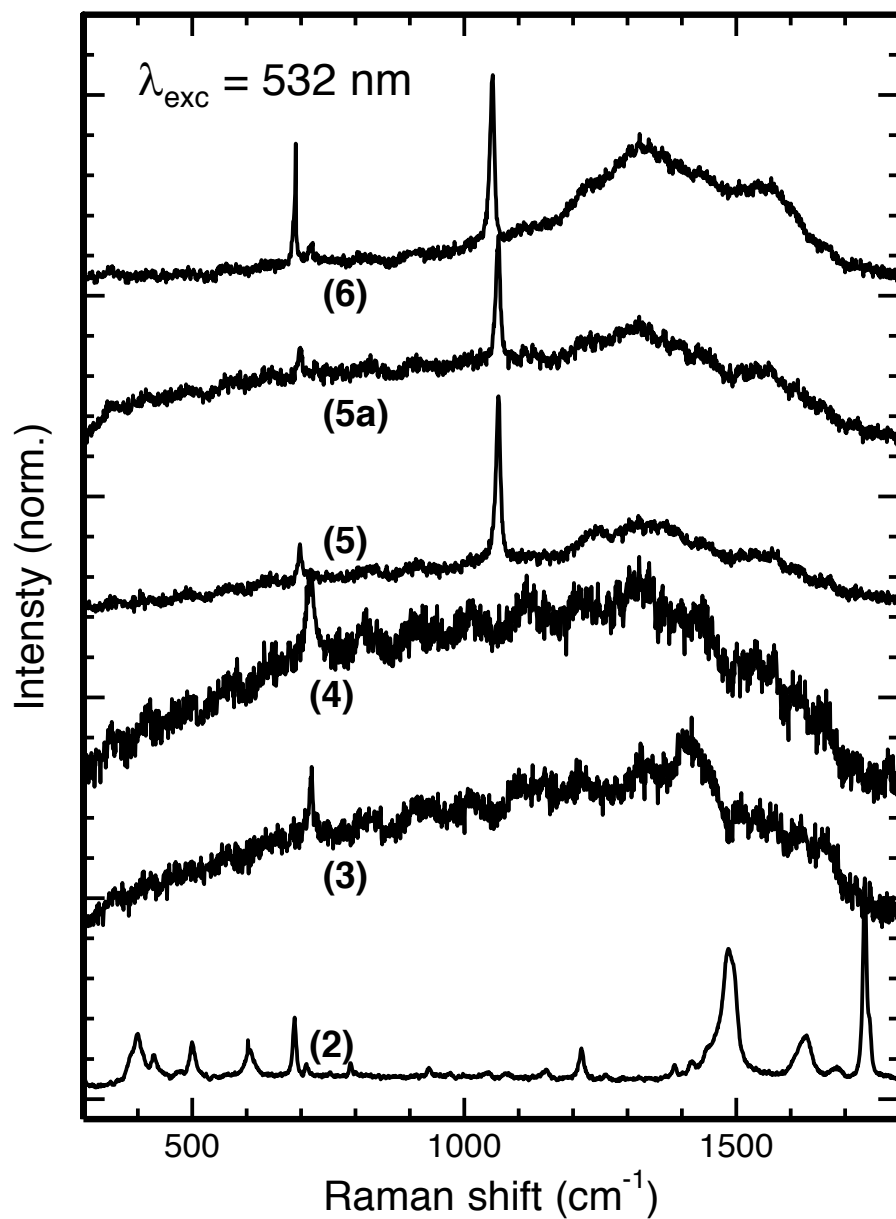

**Figure S19.** Raman spectra of compounds 2-6 from bottom to top. Laser wavelength was 532 nm, the detection was unpolarized. All spectra were normalized to their respective maximum and shifted vertically for better visibility.

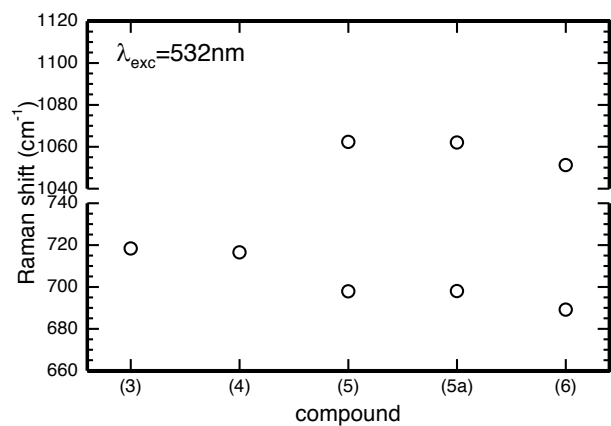

**Figure S20.** Raman peak positions for compounds **3-6** as determined from the spectra shown in Fig. S19. Only the sharp features around 700 cm<sup>-1</sup> and 1050 cm<sup>-1</sup> for **5** and **6** are shown. The results for compound **5** and **5a** are identical. A decrease of Raman shift with increasing AE atomic mass is observed (AE = Mg–Ba).

#### 4. UV-vis Spectra

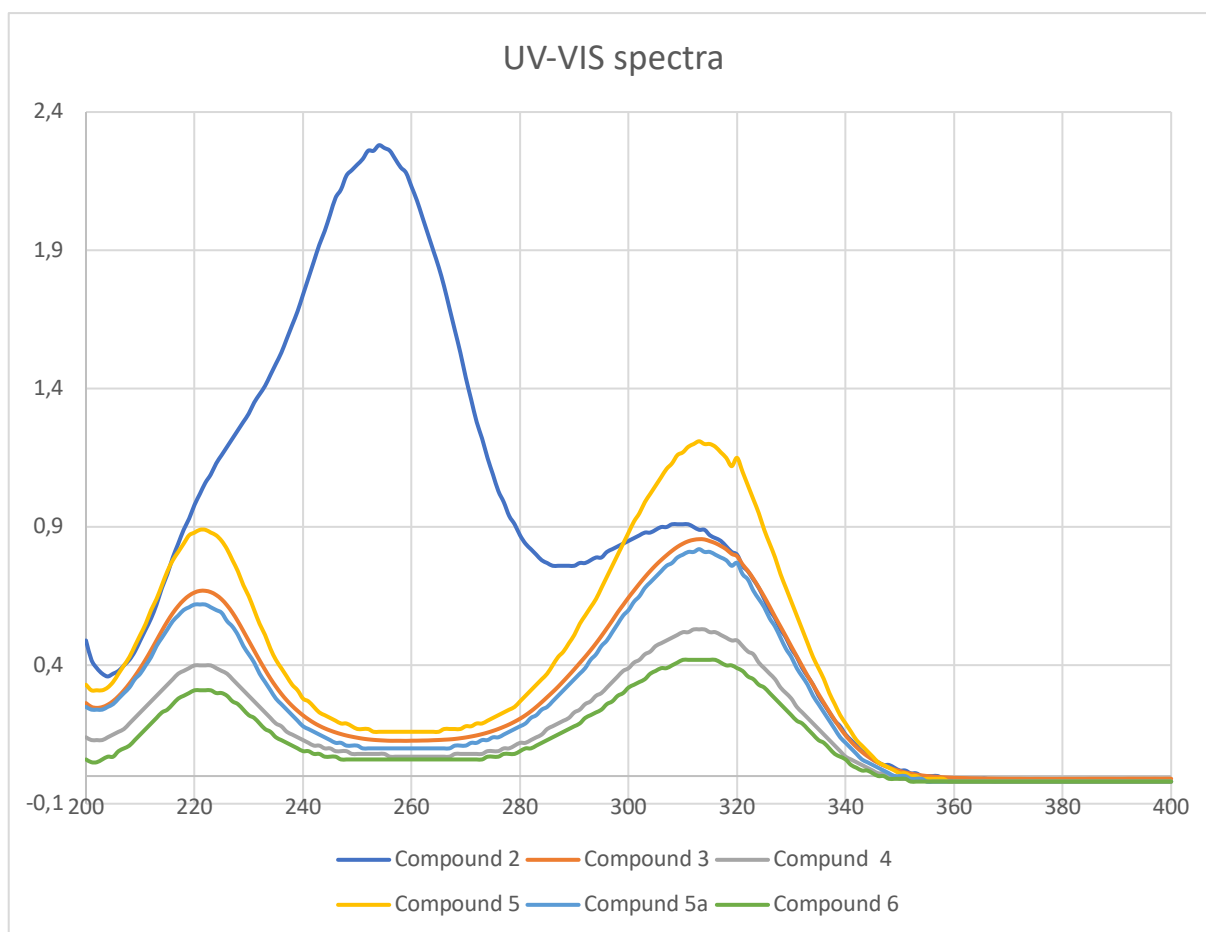

**Figure S21.** UV-vis spectra of compounds 2-6 in aqueous solution.
